# Supplementary material
Source: PubMed Central journal article supplement (PMC4588628)
Supplement: EC.00122-15_zek999094482so3.pdf [file EC.00122-15_zek999094482so3.pdf]

**TABLE S1 DNA oligos used in this study**

| <b>Custom Oligos [<i>Coccidioides</i> gene targets]</b>                         |                                   |                      |
|---------------------------------------------------------------------------------|-----------------------------------|----------------------|
| <b>Oligo Name</b>                                                               | <b>Oligo Sequence (5'-&gt;3')</b> |                      |
| <b><i>gapdh</i> forward primer</b>                                              | 5'-ACCAACTGTCTTGCTCCTTTG-3'       |                      |
| <b><i>gapdh</i> reverse primer</b>                                              | 5'-AGTCTTCTGAGTGGCGGTATAG-3'      |                      |
| <b>IDT PrimeTime qPCR Primers (Integrated DNA Technologies, Coralville, IA)</b> |                                   |                      |
| <b>[Mouse gene targets]</b>                                                     |                                   |                      |
| <b>Gene Symbol</b>                                                              | <b>Assay ID</b>                   | <b>Exon Location</b> |
| <b><i>gapdh</i></b>                                                             | Mm.PT.39a.1                       | 2 - 3                |
| <b><i>ifny</i></b>                                                              | Mm.PT.58.30096391                 | 3 - 4                |
| <b><i>ifnyr1</i></b>                                                            | Mm.PT.58.41904276                 | 6 - 7                |
| <b><i>il-1<math>\alpha</math></i></b>                                           | Mm.PT.58.8990846                  | 6 - 7                |
| <b><i>il-1<math>\beta</math></i></b>                                            | Mm.PT.58.44004828                 | 6 - 7                |
| <b><i>il-1r1</i></b>                                                            | Mm.PT.58.28723859                 | 10 - 11              |
| <b><i>il-2</i></b>                                                              | Mm.PT.58.11478202                 | 1 - 3                |
| <b><i>il-4</i></b>                                                              | Mm.PT.58.42411598.g               | 3 - 3                |
| <b><i>il-10</i></b>                                                             | Mm.PT.58.13531087                 | 3 - 5                |
| <b><i>il-13</i></b>                                                             | Mm.PT.58.11338747                 | 1 - 3                |
| <b><i>il-17<math>\alpha</math></i></b>                                          | Mm.PT.58.6531092                  | 2 - 3                |
| <b><i>il-17<math>\alpha</math></i></b>                                          | Mm.PT.58.16204293                 | 11 - 13              |
| <b><i>tnfa</i></b>                                                              | Mm.PT.58.12575861                 | 2 - 4                |

**TABLE S2** Cytokine Mouse Magnetic 20-Plex Panel (Thermo Fisher Scientific, San Jose, CA)

|                |        |               |              |             |
|----------------|--------|---------------|--------------|-------------|
| FGF-Basic      | GM-CSF | IFN $\gamma$  | IL1 $\alpha$ | IL1 $\beta$ |
| IL2            | IL4    | IL5           | IL6          | IL10        |
| IL12 (p40/p70) | IL13   | IL17          | IP10         | KC          |
| MCP1           | MIG    | MIP1 $\alpha$ | TNF $\alpha$ | VEGF        |

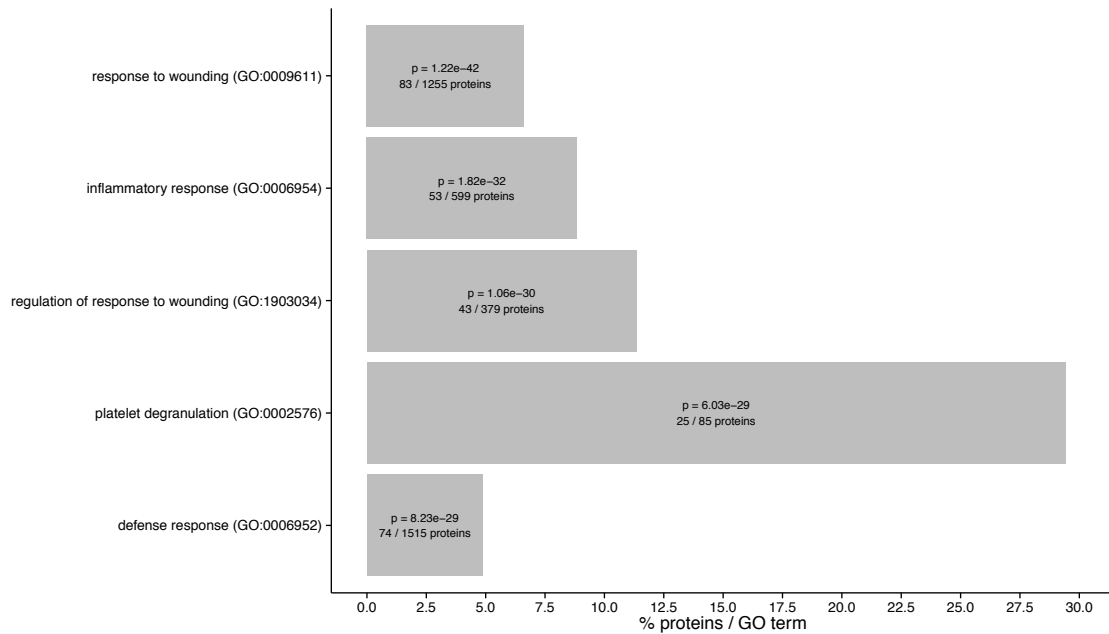

**FIG S1** TopGene enrichment analysis of mouse proteins identified in BALFs collected from the 2006 infection group on day five of the experiment. Enriched terms from the biological process ontology were ranked by p-value and only the five most significant terms were retained for interpretation of the host response to *Coccidioides* infection in BALFs.

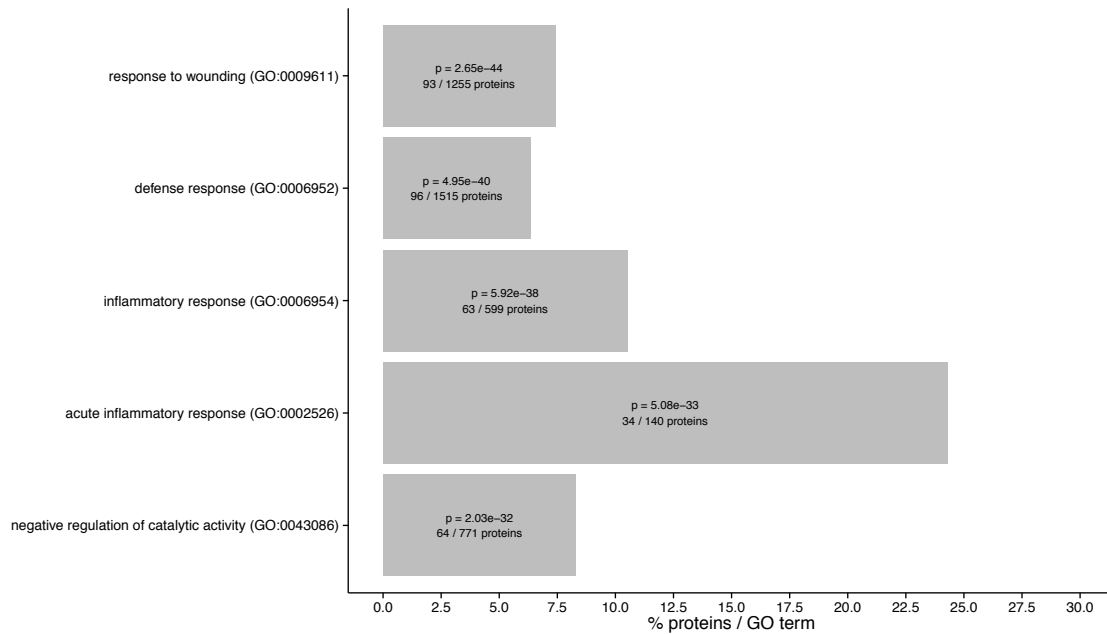

**FIG S2** TopGene enrichment analysis of mouse proteins identified in BALFs collected from the RS infection group on day five of the experiment. Enriched terms from the biological process ontology were ranked by p-value and only the five most significant terms were retained for interpretation of the host response to *Coccidioides* infection in BALFs.

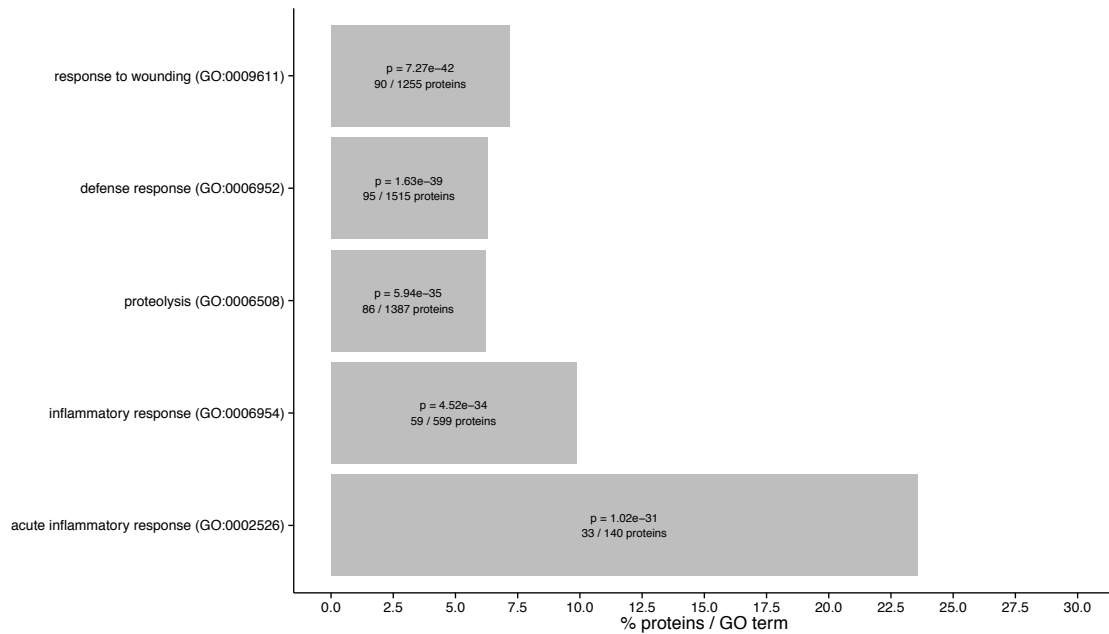

**FIG S3** TopGene enrichment analysis of mouse proteins identified in BALFs collected from the Silveira infection group on day five of the experiment. Enriched terms from the biological process ontology were ranked by p-value and only the five most significant terms were retained for interpretation of the host response to *Coccidioides* infection in BALFs.

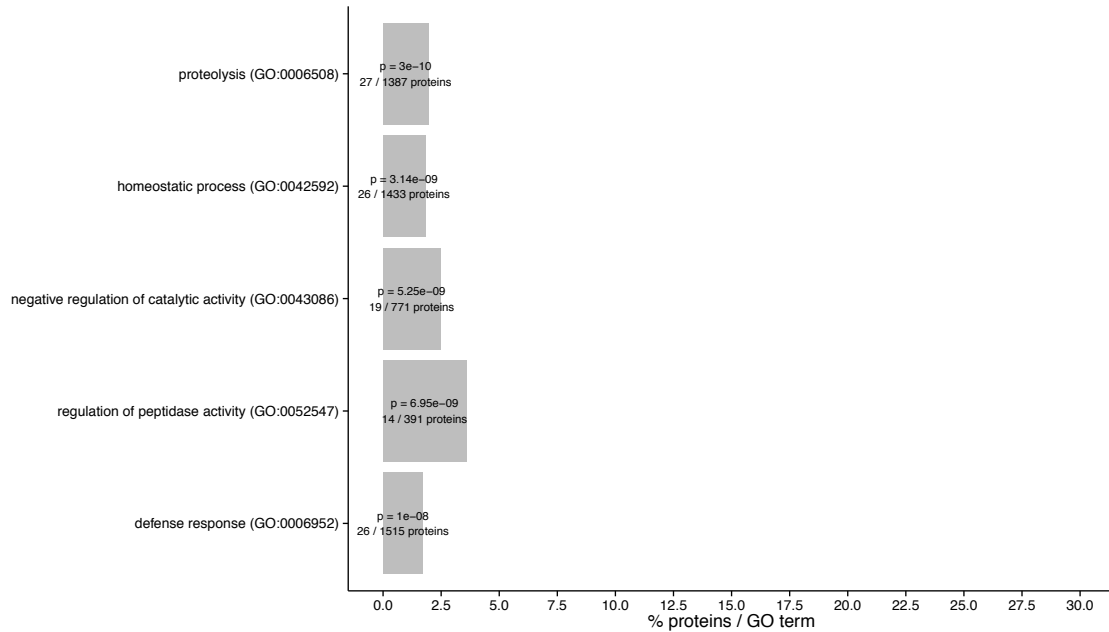

**FIG S4** TopGene enrichment analysis of mouse proteins identified in BALFs collected from the uninfected control group on day five of the experiment. Enriched terms from the biological process ontology were ranked by p-value and only the five most significant terms were retained for interpretation of the host response to *Coccidioides* infection in BALFs.
